# Supplementary material for: Understanding environmental decision-making in forest restoration: the role of latent attitudes, attribute non-attendance, and choice behavior
Source: Frontiers journal article supplement (doi:10.3389/frbhe.2025.1596416), 2025-05-20
Supplement: Supplementary_file_3.docx [file Supplementary_file_3.docx]

Appendix 3. The result of PCA with IBM SPSS 24 (28.0.1.1)

|  | Component | | | | |
| --- | --- | --- | --- | --- | --- |
| 1 | 2 | 3 | 4 | 5 |
| A3_6 | **0.782** | -0.018 | -0.108 | 0.189 | -0.148 |
| A3_4 | **0.752** | 0.021 | -0.155 | 0.095 | -0.096 |
| A2_2 | **0.656** | 0.130 | 0.017 | -0.074 | 0.457 |
| A2_1 | **0.610** | 0.109 | 0.084 | -0.047 | 0.492 |
| A3_5 | **0.593** | 0.033 | 0.259 | 0.022 | 0.026 |
| A3_3 | **0.545** | 0.085 | -0.195 | 0.360 | -0.203 |
| A1_3 | 0.025 | **0.758** | 0.296 | 0.078 | 0.064 |
| A1_2 | 0.052 | **0.756** | 0.199 | 0.202 | 0.143 |
| A1_4 | 0.087 | **0.727** | 0.033 | 0.188 | 0.004 |
| A1_1 | 0.096 | **0.689** | 0.051 | 0.238 | 0.102 |
| A2_4 | -0.061 | 0.159 | **0.806** | 0.087 | 0.094 |
| A2_3 | -0.073 | 0.188 | **0.724** | 0.167 | 0.143 |
| A2_5 | 0.078 | 0.104 | **0.655** | 0.273 | 0.079 |
| A1_5 | -0.089 | 0.461 | **0.462** | -0.073 | 0.230 |
| A1_7 | 0.098 | 0.164 | 0.168 | **0.725** | 0.090 |
| A3_7 | 0.213 | 0.123 | 0.050 | **0.704** | 0.102 |
| A1_8 | -0.081 | 0.344 | 0.183 | **0.624** | 0.195 |
| A1_6 | 0.092 | 0.170 | 0.330 | **0.485** | 0.113 |
| A3_1 | -0.090 | 0.096 | 0.187 | 0.148 | **0.698** |
| A3_2 | -0.017 | 0.158 | 0.140 | 0.315 | **0.689** |

Note: Extraction Method: Principal Component Analysis; Rotation Method: Varimax with Kaiser Normalization; Rotation converged in 6 iterations.
